# Supplementary material for: The difference of regulatory effect of two Inonotus obliquus extracts on high‐fat diet mice in relation to the fatty acid elongation function of gut microbiota
Source: PubMed Central journal article supplement (PMC7802550; doi:10.1002/fsn3.2012), 2020-11-24
Supplement: FSN3-9-449-s001.pdf [file FSN3-9-449-s001.pdf]

## Supplemental Figure

### THE DIFFERENCE OF REGULATORY EFFECT OF TWO INONOTUS OBLIQUUS EXTRACTS ON HIGH FAT-DIET MICE IN RELATION TO THE FATTY ACID ELONGATION FUNCTION OF GUT MICROBIOTA

Jian Yu <sup>3</sup>, Jun-Yan Xiang <sup>3</sup>, Hongyu Xiang <sup>1,2,3\*</sup>, Qihong Xie <sup>1,2,3\*</sup>

<sup>1</sup> Key Laboratory for Molecular Enzymology and Engineering of Ministry of Education, School of Life Sciences, Jilin University, Changchun, Jilin 130012, People's Republic of China

<sup>2</sup> National Engineering Laboratory for AIDS Vaccine, School of Life Sciences, Jilin University, Changchun, Jilin 130012, People's Republic of China

<sup>3</sup> School of Life Sciences, Jilin University, Changchun, Jilin 130012, People's Republic of China

\* Corresponding authors:

Hongyu Xiang, Professor; E-mail: [hyxiang@jlu.edu.cn](mailto:hyxiang@jlu.edu.cn)

Qihong Xie, Professor; E-mail: [qhxic@jlu.edu.cn](mailto:qhxic@jlu.edu.cn)

Tel & Fax: +86-431-85153832

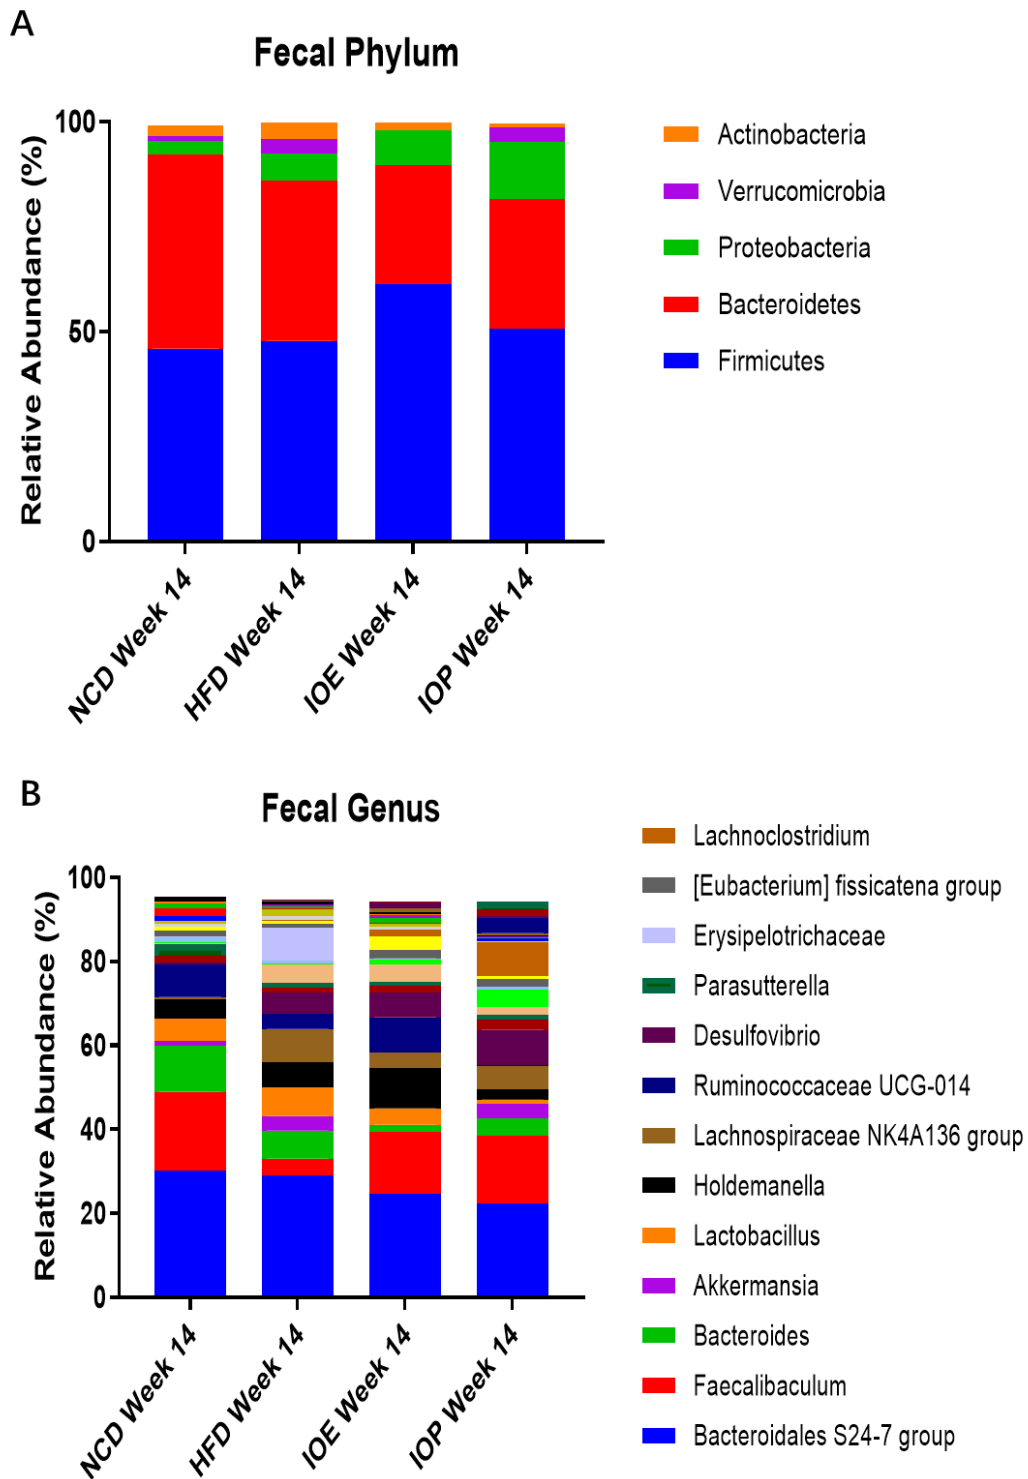

Figure S1. The composition of gut microbiota at week 14. (A) The composition of gut microbiota at phylum level; (B) The composition of gut microbiota at genus level

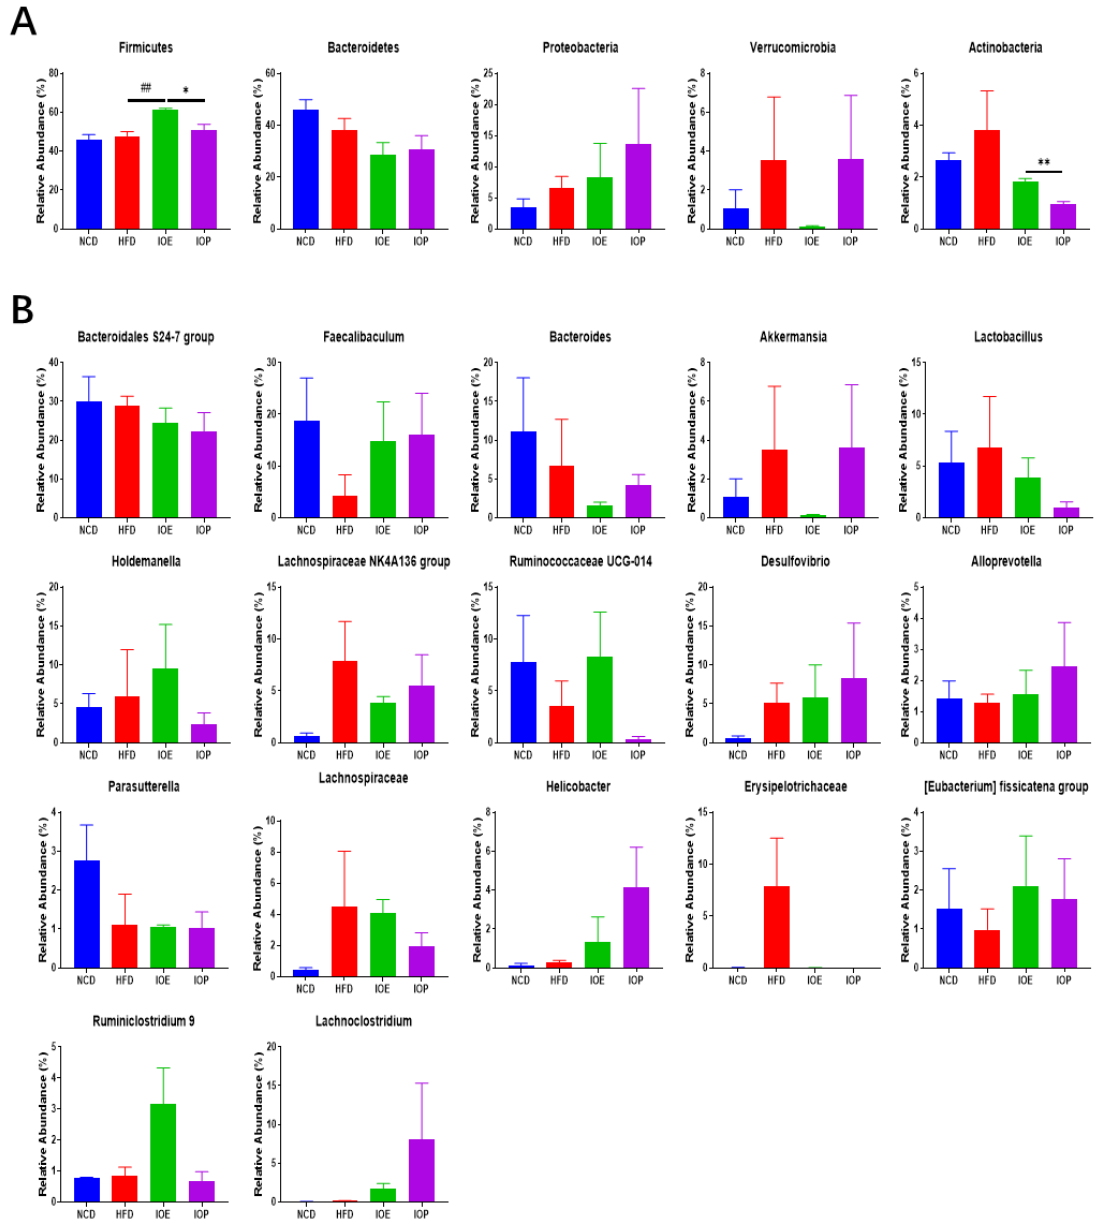

Figure S2. Statistical analysis of gut microbial relative abundance at week 14. (A) Statistical analysis of microbiota at the phylum level; (B) Statistical analysis of microbiota at the genus level. #:  $P < 0.05$  (vs. HFD); ##:  $P < 0.01$  (vs. HFD); ###:  $P < 0.001$  (vs. HFD); \*:  $P < 0.05$  (IOE vs. IOP); \*\*:  $P < 0.01$  (IOE vs. IOP); \*\*\*:  $P < 0.001$  (IOE vs. IOP).

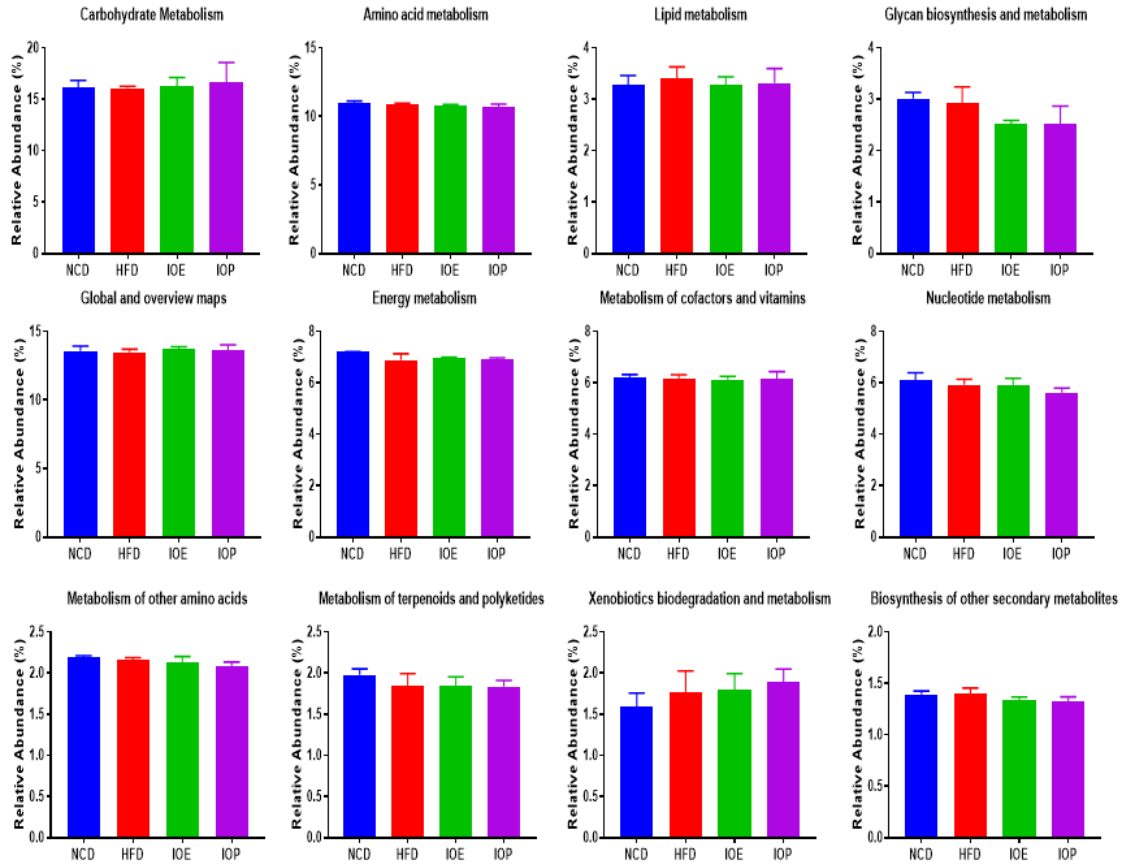

Figure S3. Statistical analysis of gut microbial predictive function (Class 2) of metabolism (Class 1) at week 14.

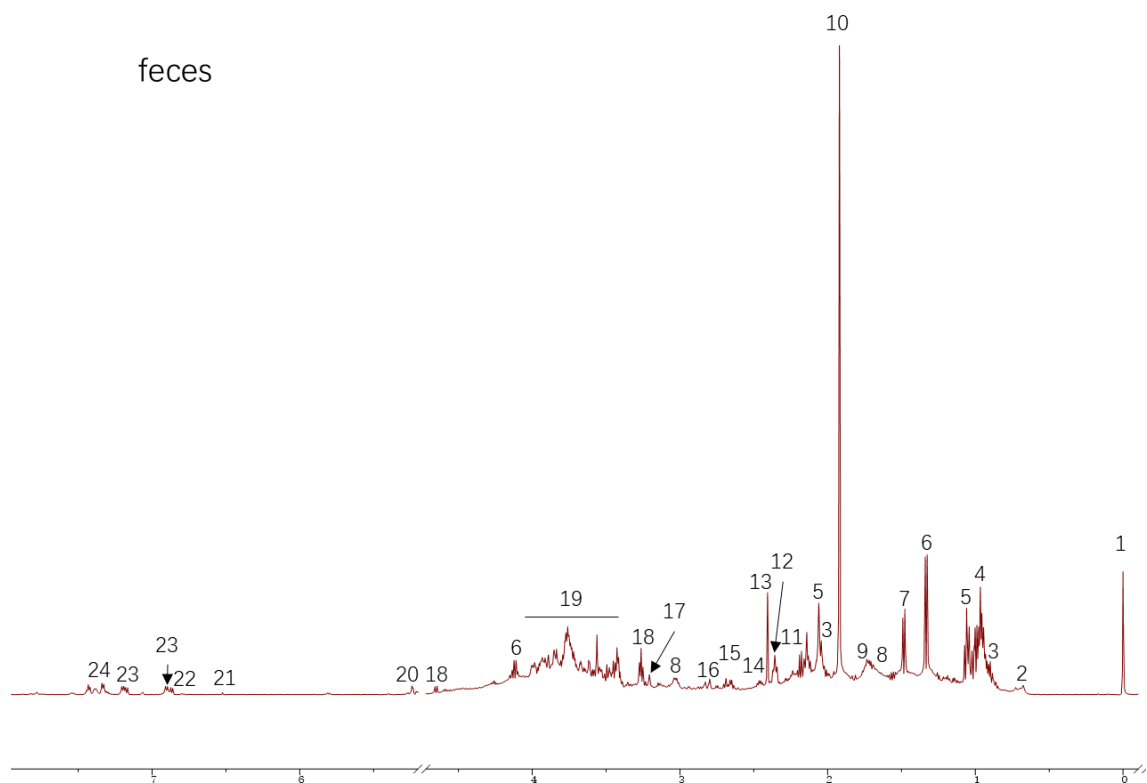

Figure S4. 600 MHz  $^1\text{H}$  NMR spectra of mice urine. Keys : 1.TSP; 2.Bile acids; 3.Butyrate; 4.Bcaa; 5.Propionate; 6.Lactate ; 7.Alanine; 8.Lysine ; 9.5-aminovalerate ; 10.Acetate ; 11.Lipid; 12.Glutamate ; 13.Succinate; 14.Glutamine; 15.Citrate; 16.Aspartate; 17.Choline; 18. $\beta$ -Glucose; 19.Glucose; 20. $\alpha$ -Glucose; 21.Fumarate; 22.Aminohippurate; 23.Tyrosine; 24.phenylacetyl glycine (PAG).

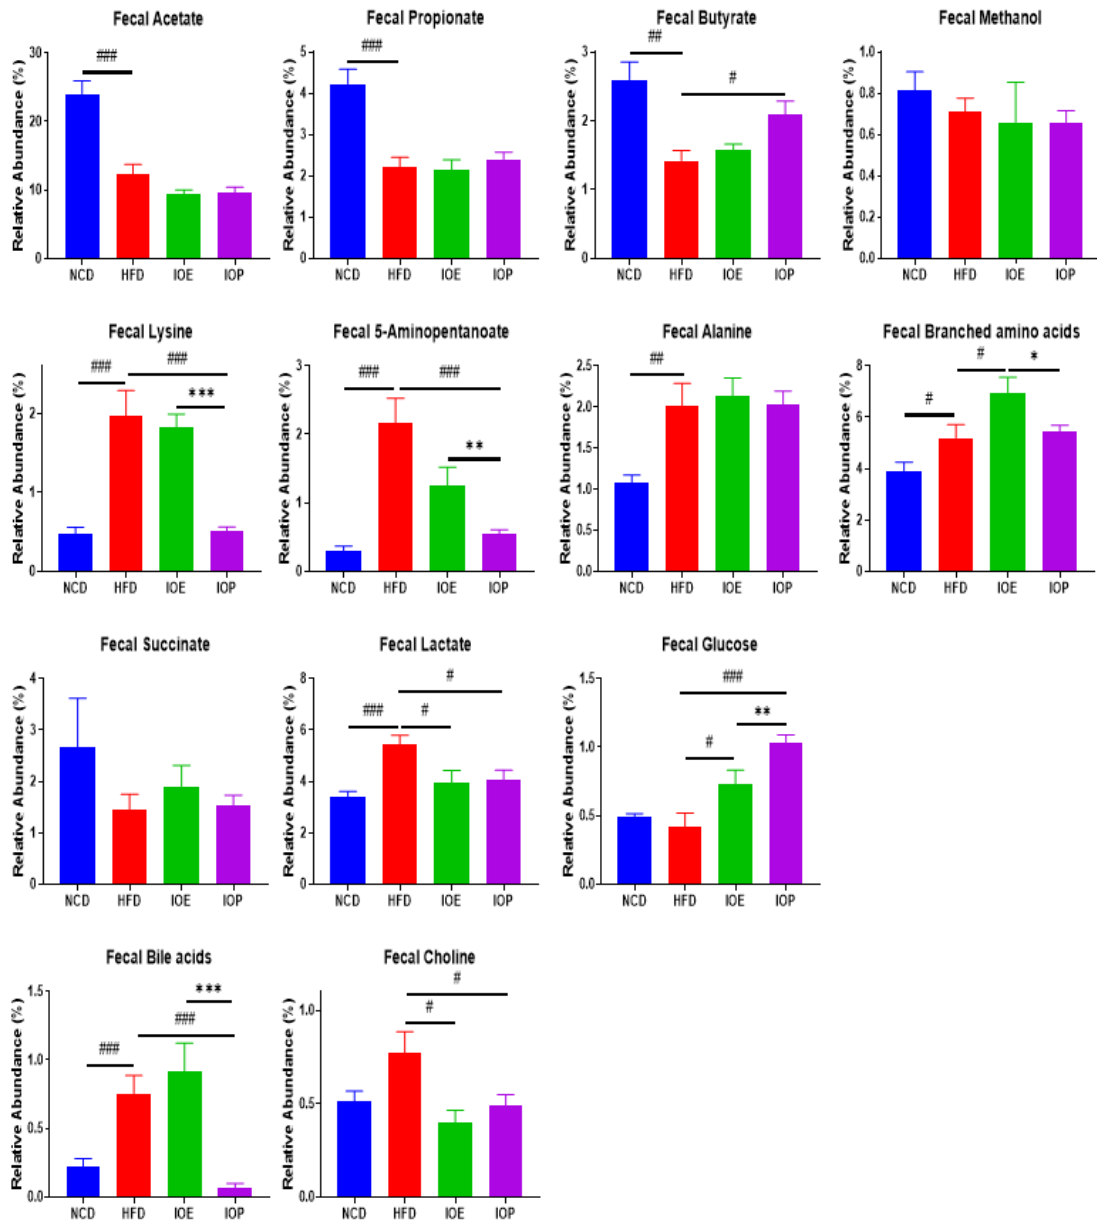

Figure S5. Main metabolites (VIP > 2) identified through <sup>1</sup>H NMR data of fecal samples at week 14. #: P < 0.05 (vs. HFD); ##: P < 0.01 (vs. HFD); ###: P < 0.001 (vs. HFD); \*: P < 0.05 (IOE vs. IOP); \*\*: P < 0.01 (IOE vs. IOP); \*\*\*: P < 0.001 (IOE vs. IOP).

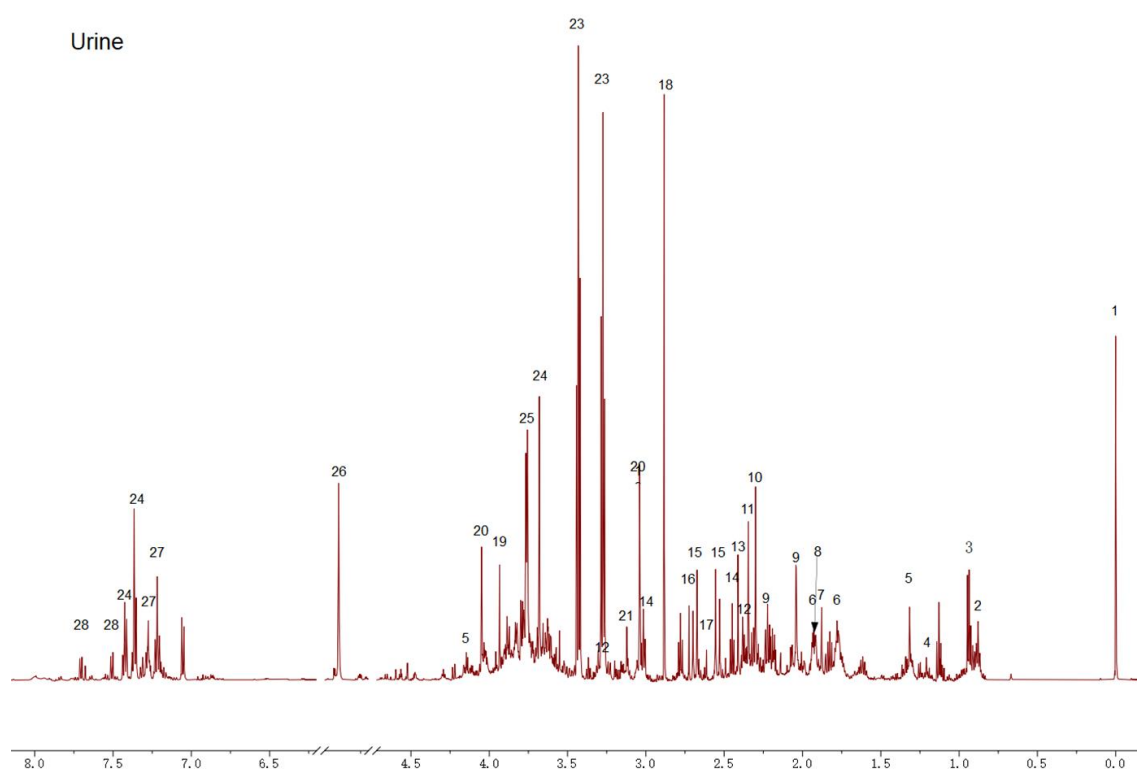

Figure S6. 600 MHz  $^1\text{H}$  NMR spectra of mice urine. Keys: 1, TSP; 2, Butyrate; 3, Isoleucine; 4, 3-hydroxybutyrate; 5, Lactate; 6, Arginine; 7, Thymine; 8, Acetate; 9, N-acetylglutamate (NAG); 10, Acetoacetate; 11, Pyruvate; 12, 3-Ureidopropionate; 13, Succinate; 14, 2-Oxoglutarate; 15, Citrate; 16, Dimethylamine (TMA); 17, Methylamine; 18, Trimethylamine (TMA); 19, Creatine; 20, Creatinine; 21, Cis-aconitate; 22, Choline; 23, Taurine; 24, PhenylAcetyl Glycine (PAG); 25, Amino acid; 26, Allatoxin; 27, 3-Indoxylsulfate; 28, N-methylnicotinamide (NMND).

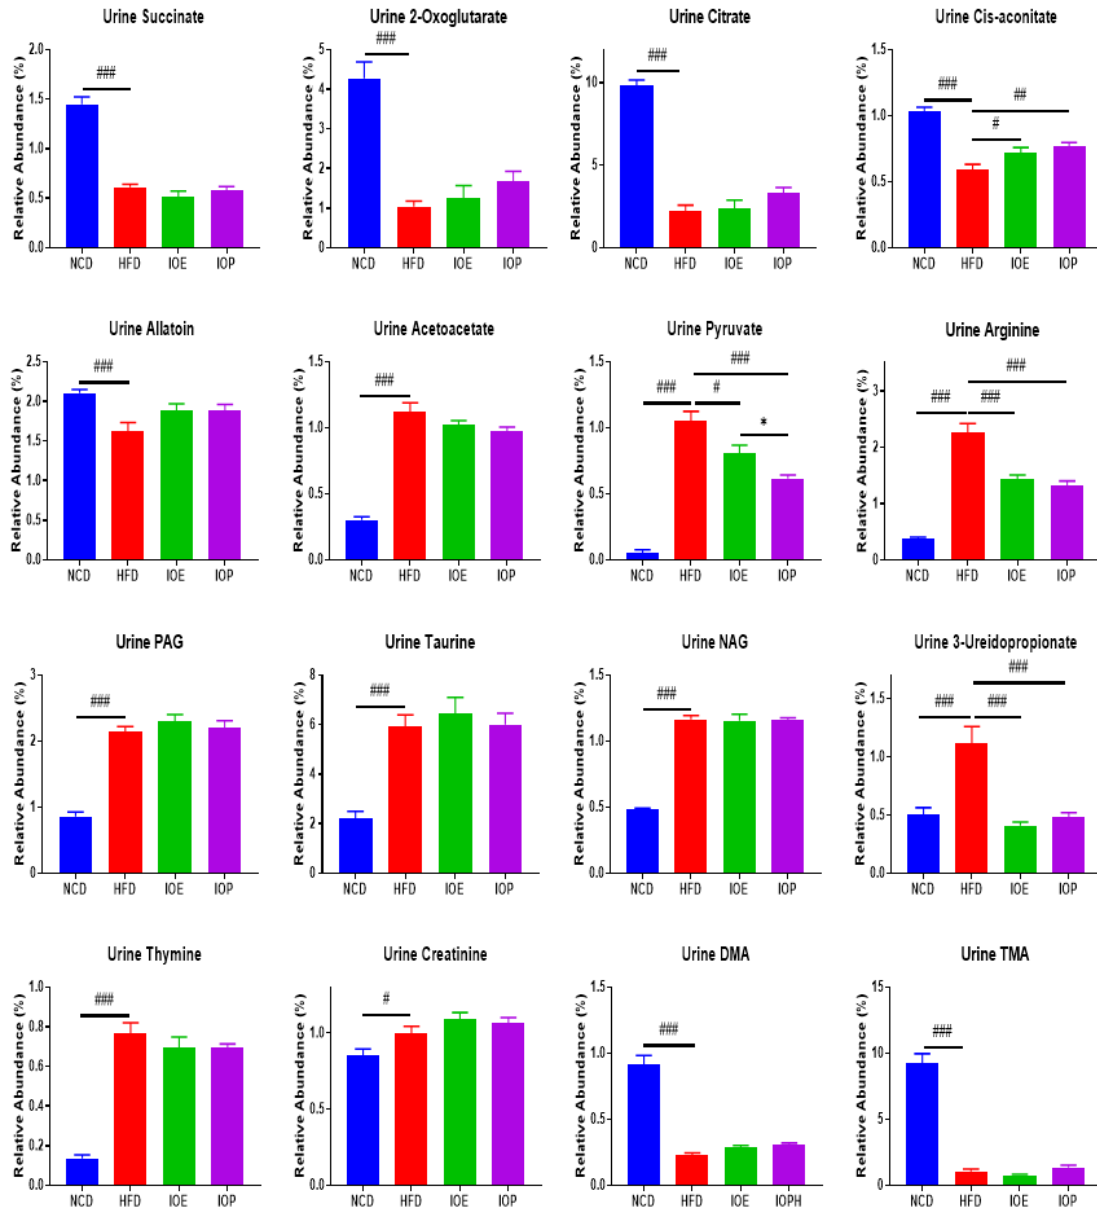

Figure S7. Main metabolites (VIP > 2) identified through  $^1\text{H}$  NMR data of urine samples at week 14. #:  $P < 0.05$  (vs. HFD); ##:  $P < 0.01$  (vs. HFD); ###:  $P < 0.001$  (vs. HFD); \*:  $P < 0.05$  (IOE vs. IOP); \*\*:  $P < 0.01$  (IOE vs. IOP); \*\*\*:  $P < 0.001$  (IOE vs. IOP).



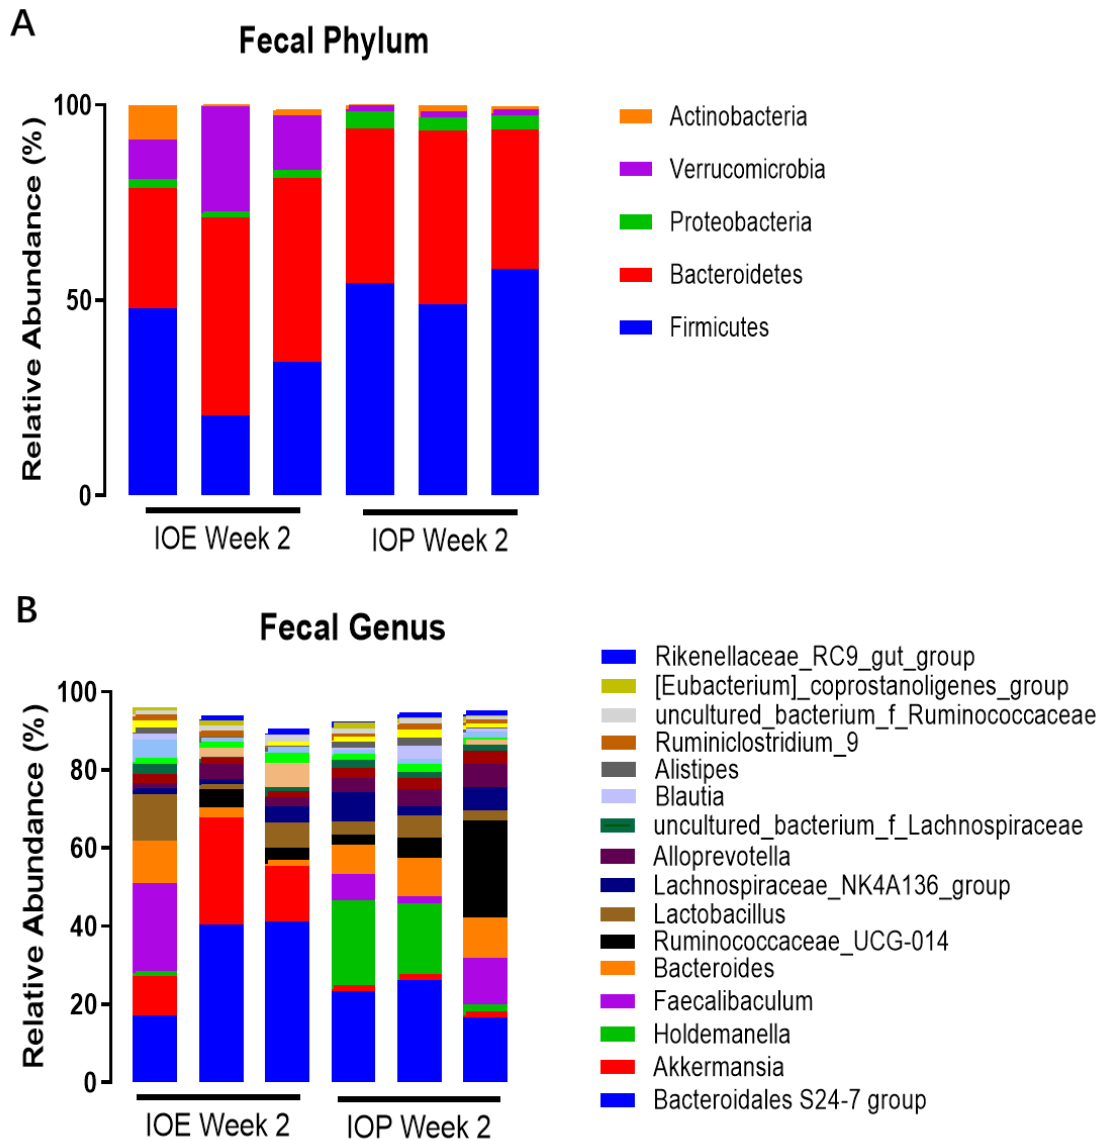

Figure S8. The composition of gut microbiota in the IOE group and the IOP group at week 2. (A) The composition of gut microbiota at phylum level; (B) The composition of gut microbiota at genus level
